# Supplementary material
Source: publisher figshare collection journal article supplement (https://brill.figshare.com/articles/dataset/_/1595887)
Supplement: Supplementary file 1 [file 1]

## **The Synoptic Art Experience**

**M.W.A. Wijntjes, A. Füzy, M.E.S. Verheij, T. Deetman and S.C. Pont**

Perceptual Intelligence Lab, Industrial Design Engineering, Delft University of Technology, The Netherlands

**Supplementary Table S1.** Links to the original works at the Rijksmuseum website

| Label number | Experiment | Title                                                          | Artist                           | Year                | Hyperlink                                                                                                         |
|--------------|------------|----------------------------------------------------------------|----------------------------------|---------------------|-------------------------------------------------------------------------------------------------------------------|
| 1            | 1A,2*      | Man in Oriental Dress                                          | Rembrandt Harmensz. van Rijn     | 1653                | <a href="http://hdl.handle.net/10934/RM0001.COLLECT.5218">http://hdl.handle.net/10934/RM0001.COLLECT.5218</a>     |
| 2            | 1A         | Still Life with a Gilt Cup                                     | Willem Claesz. Heda              | 1635                | <a href="http://hdl.handle.net/10934/RM0001.collect.8634">http://hdl.handle.net/10934/RM0001.collect.8634</a>     |
| 3            | 1A,2       | Still Life with Cheese                                         | Floris Claesz. van Dijck         | 1615                | <a href="http://hdl.handle.net/10934/RM0001.COLLECT.8296">http://hdl.handle.net/10934/RM0001.COLLECT.8296</a>     |
| 4            | 1A,2*      | Self-portrait                                                  | Vincent van Gogh                 | 1887                | <a href="http://hdl.handle.net/10934/RM0001.COLLECT.9617">http://hdl.handle.net/10934/RM0001.COLLECT.9617</a>     |
| 5            | 1A,2       | Still Life with a Turkey Pie                                   | Pieter Claesz.                   | 1627                | <a href="http://hdl.handle.net/10934/RM0001.collect.8143">http://hdl.handle.net/10934/RM0001.collect.8143</a>     |
| 6            | 1A,2*      | The Singel Bridge at the Paleisstraat in Amsterdam             | George Hendrik Breitner          | 1896                | <a href="http://hdl.handle.net/10934/RM0001.COLLECT.6274">http://hdl.handle.net/10934/RM0001.COLLECT.6274</a>     |
| 7            | 1A,2*      | Children of the Sea                                            | Jozef Israëls                    | 1872                | <a href="http://hdl.handle.net/10934/RM0001.COLLECT.8817">http://hdl.handle.net/10934/RM0001.COLLECT.8817</a>     |
| 8            | 1A         | The Square Man                                                 | Karel Appel                      | 1951                | <a href="http://hdl.handle.net/10934/RM0001.collect.461072">http://hdl.handle.net/10934/RM0001.collect.461072</a> |
| 9            | 1A,1B,2*   | Girl in a White Kimono                                         | George Hendrik Breitner          | 1894                | <a href="http://hdl.handle.net/10934/RM0001.COLLECT.6250">http://hdl.handle.net/10934/RM0001.COLLECT.6250</a>     |
| 10           | 1A,2       | Portrait of Alida Christina Assink                             | Jan Adam Kruseman                | 1833                | <a href="http://hdl.handle.net/10934/RM0001.COLLECT.358121">http://hdl.handle.net/10934/RM0001.COLLECT.358121</a> |
| 11           | 1A,1B,2*   | Italian Landscape with Umbrella Pines                          | Hendrik Voogd                    | 1807                | <a href="http://hdl.handle.net/10934/RM0001.COLLECT.6477">http://hdl.handle.net/10934/RM0001.COLLECT.6477</a>     |
| 12           | 1A,2*      | Still Life with Asparagus                                      | Adriaen Coorte                   | 1697                | <a href="http://hdl.handle.net/10934/RM0001.COLLECT.8161">http://hdl.handle.net/10934/RM0001.COLLECT.8161</a>     |
| 13           | 1A,2       | The Windmill at Wijk bij Duurstede                             | Jacob Isaacksz. van Ruisdael     | 1668 - 1670         | <a href="http://hdl.handle.net/10934/RM0001.COLLECT.5333">http://hdl.handle.net/10934/RM0001.COLLECT.5333</a>     |
| 14           | 1A,2*      | View of Olinda, Brazil                                         | Frans Jansz Post                 | 1662                | <a href="http://hdl.handle.net/10934/RM0001.COLLECT.5088">http://hdl.handle.net/10934/RM0001.COLLECT.5088</a>     |
| 15           | 1A,2*      | Still Life with Books in a Niche                               | Barthélémy d' Eyck               | 1442 - 1445         | <a href="http://hdl.handle.net/10934/RM0001.COLLECT.9060">http://hdl.handle.net/10934/RM0001.COLLECT.9060</a>     |
| 16           | 1B,2       | Dutch Ships Running Down Spanish Galleys off the English Coast | Hendrik Cornelisz. Vroom         | 1617                | <a href="http://hdl.handle.net/10934/RM0001.COLLECT.6501">http://hdl.handle.net/10934/RM0001.COLLECT.6501</a>     |
| 17           | 1B,2       | The Artist Painting a Cow in a Meadow                          | Hendrikus van de Sande Bakhuyzen | 1850                | <a href="http://hdl.handle.net/10934/RM0001.COLLECT.5371">http://hdl.handle.net/10934/RM0001.COLLECT.5371</a>     |
| 18           | 1B,2       | Duck nests                                                     | Paul Joseph Constantin Gabriël   | ca. 1890 - ca. 1900 | <a href="http://hdl.handle.net/10934/RM0001.collect.8451">http://hdl.handle.net/10934/RM0001.collect.8451</a>     |
| 19           | 1B,2       | The Zuiderhavendijk, Enkhuizen                                 | Cornelis Springer                | 1868                | <a href="http://hdl.handle.net/10934/RM0001.COLLECT.5485">http://hdl.handle.net/10934/RM0001.COLLECT.5485</a>     |
| 20           | 1B,2*      | Wooded View near Barbizon                                      | Johan Hendrik Weissenbruch       | 1900                | <a href="http://hdl.handle.net/10934/RM0001.COLLECT.6521">http://hdl.handle.net/10934/RM0001.COLLECT.6521</a>     |
| 21           | 1B,2*      | Four Cows in a Meadow                                          | Paulus Potter                    | 1651                | <a href="http://hdl.handle.net/10934/RM0001.COLLECT.5093">http://hdl.handle.net/10934/RM0001.COLLECT.5093</a>     |
| 22           | 1B,2*      | Ducks                                                          | Willem Maris                     | ca. 1880 - ca. 1904 | <a href="http://hdl.handle.net/10934/RM0001.COLLECT.9008">http://hdl.handle.net/10934/RM0001.COLLECT.9008</a>     |
